# Supplementary material
Source: publisher figshare collection journal article supplement (https://gsajournals.figshare.com/ndownloader/files/26000408)
Supplement: Supplementary file 1 [file 26000408]

,Contig,Length,"GC %","Read Depth",Group,Keep,Notes
,tig00003593,"1,491,928",51.00,88,1,yes,Chromosome
,tig00003595,"1,243,548",50.64,133,2,yes,"Chromosome, supernumerary"
,tig00000023,"445,576",49.83,75,2,yes,"Haplotype, tig3595"
,tig00000026,"342,611",53.96,63,2,yes,"Haplotype, tig3595"
,tig00000024,"212,351",46.57,32,2,yes,"Haplotype, tig3595"
,tig00306615,"1,178,086",50.76,88,3,yes,Incomplete
,tig00000050,"231,117",51.90,32,3,yes,Incomplete
,tig00000037,"1,166,746",52.03,81,4,yes,Chromosome
,tig00000038,"189,704",54.46,23,4,yes,"Haplotype tig37"
,tig00000043,"176,899",50.84,38,4,yes,"Haplotype tig37"
,tig00000018,"1,076,494",51.74,83,5,yes,Inversion
,tig00003597,"222,300",51.74,41,5,yes,Inversion
,tig00000065,"104,319",53.68,35,5,yes,"Haplotype tig18/tig3597"
,tig00000033,"60,239",47.81,34,5,yes,"Subtelomere tig3597"
,tig00003614,"15,476",47.65,0,5,no,"Repeat tig33/tig3597"
,tig00003601,"1,014,199",49.99,80,6,yes,Chromosome
,tig00000049,"134,114",49.88,40,6,yes,"Haplotype tig3601"
,tig00003602,"58,238",50.02,4,6,yes,"Subtelomere tig3601"
,tig00003599,"988,284",49.80,83,7,yes,Incomplete
,tig00003600,"73,365",47.82,0,7,yes,"Haplotype tig3599"
,tig00000047,"71,900",49.33,3,7,yes,"Subtelomere tig3599"
,tig00000070,"852,128",49.89,89,8,yes,Chromosome
,tig00000060,"773,343",49.71,86,9,yes,Chromosome
,tig00000061,"93,668",48.89,28,9,yes,"Subtelomere tig60"
,tig00003605,"767,908",49.77,82,10,yes,Chromosome
,tig00000377,"125,489",44.00,31,10,yes,"Haplotype tig 3605"
,tig00000058,"767,463",50.90,86,11,yes,Incomplete
,tig00000055,"758,682",49.36,83,12,yes,Chromosome
,tig00000104,"692,209",51.35,82,13,yes,"Chromosome, translocation tig126"
,tig00000126,"521,443",50.57,87,14,yes,"Incomplete, translocation tig104"
,tig00000177,"219,070",46.78,45,14,yes,"Incomplete, translocation tig104"
,tig00000417,"118,437",50.28,44,14,yes,"Haplotype tig104/tig177"
,tig00000063,"646,966",49.19,88,15,yes,Chromosome
,tig00000069,"103,614",49.86,17,15,yes,"Haplotype tig63"
,tig00003607,"622,755",48.30,67,16,yes,Chromosome
,tig00000099,"197,835",51.08,7,16,yes,"Haplotype tig3607"
,tig00000082,"602,195",50.56,87,17,yes,Chromosome
,tig00000084,"587,628",50.41,86,18,yes,Chromosome
,tig00000093,"133,264",49.21,41,18,yes,"Haplotype tig84"
,tig00000095,"569,734",50.07,41,19,yes,Incomplete
,tig00000181,"234,596",47.67,38,19,yes,"Haplotype tig95"
,tig00000105,"124,507",53.33,33,19,yes,"Subtelomere tig95"
,tig00306621,"544,153",50.01,86,20,yes,Chromosome
,tig00000134,"525,903",49.54,62,21,yes,Incomplete
,tig00000184,"226,671",49.33,30,21,yes,"Haplotype tig134"
,tig00000197,"520,223",51.31,40,22,yes,Chromosome
,tig00306623,"145,515",49.30,12,22,yes,"Subtelomere tig197"
,tig00000208,"124,316",52.93,20,22,yes,"Subtelomere tig197"
,tig00306624,"96,365",48.96,0,22,yes,"Subtelomere tig197"
,tig00000238,"507,555",49.15,69,23,yes,Chromosome
,tig00000255,"165,712",52.72,32,23,yes,"Haplotype tig238"
,tig00000218,"438,214",47.42,90,24,yes,Chromosome
,tig00003608,"422,011",47.37,83,25,yes,Incomplete
,tig00306617,"413,432",46.25,78,26,yes,Chromosome
,tig00000170,"121,725",47.56,24,26,yes,"Subtelomere 306617"
,tig00000209,"380,498",47.67,82,27,yes,Chromosome
,tig00000158,"363,446",47.62,91,28,yes,Chromosome
,tig00000182,"296,108",47.49,91,29,yes,Chromosome
,tig00000001,"57,346",31.86,83,30,no,Maxicircle
,tig00000002,"30,918",31.90,0,30,yes,Maxicircle
,tig00000005,"30,370",31.94,0,30,no,Maxicircle
,tig00000015,"915,769",31.12,71,31,yes,Symbiont
,tig00000198,"45,325",43.50,0,32,no,Minicircle
,tig00000199,"35,449",43.24,0,32,no,Minicircle
,tig00000071,"33,223",43.30,0,32,no,Minicircle
,tig00000067,"19,340",43.35,1,32,no,Minicircle
,tig00000298,"19,158",43.51,0,32,no,Minicircle
,tig00000072,"18,787",43.73,1,32,no,Minicircle
,tig00000336,"18,518",43.61,2,32,no,Minicircle
,tig00000582,"15,638",43.23,0,32,no,Minicircle
,tig00000227,"14,983",43.30,0,32,no,Minicircle
,tig00000272,"14,673",43.77,0,32,no,Minicircle
,tig00000207,"14,457",43.78,0,32,no,Minicircle
,tig00000262,"14,091",43.67,0,32,no,Minicircle
,tig00000419,"13,662",43.75,3,32,no,Minicircle
,tig00000234,"13,524",43.03,0,32,no,Minicircle
,tig00000390,"13,312",43.32,0,32,no,Minicircle
,tig00000450,"13,168",43.32,0,32,no,Minicircle
,tig00000081,"13,160",42.97,0,32,no,Minicircle
,tig00000469,"12,930",43.20,15,32,no,Minicircle
,tig00000282,"12,723",43.56,1,32,no,Minicircle
,tig00000735,"12,456",43.54,1,32,no,Minicircle
,tig00000079,"12,411",43.24,0,32,no,Minicircle
,tig00000638,"12,264",43.24,0,32,no,Minicircle
,tig00003613,"12,088",43.42,0,32,no,Minicircle
,tig00306633,"11,919",42.97,0,32,no,Minicircle
,tig00000216,"11,915",43.77,0,32,no,Minicircle
,tig00000111,"11,799",42.86,0,32,no,Minicircle
,tig00306637,"11,794",43.23,0,32,no,Minicircle
,tig00000106,"11,787",43.45,0,32,no,Minicircle
,tig00000565,"11,767",43.15,0,32,no,Minicircle
,tig00000389,"11,682",43.83,14,32,no,Minicircle
,tig00000357,"11,571",43.59,1,32,no,Minicircle
,tig00000427,"11,357",42.63,0,32,no,Minicircle
,tig00000103,"11,349",42.65,0,32,no,Minicircle
,tig00306619,"11,213",43.90,1,32,no,Minicircle
,tig00000276,"11,193",42.93,0,32,no,Minicircle
,tig00000555,"11,131",42.60,0,32,no,Minicircle
,tig00000526,"10,938",43.69,0,32,no,Minicircle
,tig00000369,"10,834",43.67,0,32,no,Minicircle
,tig00000373,"10,780",43.62,0,32,no,Minicircle
,tig00000290,"10,466",43.68,0,32,no,Minicircle
,tig00000073,"10,454",43.28,0,32,no,Minicircle
,tig00000477,"10,326",44.10,1,32,no,Minicircle
,tig00000648,"10,189",42.77,0,32,no,Minicircle
,tig00000257,"10,096",43.49,1,32,no,Minicircle
,tig00000329,"9,822",43.17,0,32,no,Minicircle
,tig00000493,"9,685",43.18,1,32,no,Minicircle
,tig00000173,"9,629",43.06,0,32,no,Minicircle
,tig00000788,"9,611",43.39,5,32,no,Minicircle
,tig00000133,"9,599",42.68,1,32,no,Minicircle
,tig00000806,"9,519",42.79,1,32,no,Minicircle
,tig00000645,"9,286",43.22,0,32,no,Minicircle
,tig00000436,"9,227",42.79,0,32,no,Minicircle
,tig00000210,"9,136",43.38,0,32,no,Minicircle
,tig00000470,"9,092",43.24,0,32,no,Minicircle
,tig00000228,"9,066",43.75,0,32,no,Minicircle
,tig00000453,"8,965",44.06,0,32,no,Minicircle
,tig00000661,"8,924",43.13,0,32,no,Minicircle
,tig00000558,"8,792",43.44,0,32,no,Minicircle
,tig00000326,"8,777",43.10,0,32,no,Minicircle
,tig00000747,"8,759",43.12,2,32,no,Minicircle
,tig00306636,"8,664",43.54,4,32,no,Minicircle
,tig00306643,"8,460",43.29,0,32,no,Minicircle
,tig00000643,"8,419",44.09,1,32,no,Minicircle
,tig00306654,"8,303",42.56,0,32,no,Minicircle
,tig00000835,"8,251",44.04,0,32,no,Minicircle
,tig00000736,"8,206",43.77,1,32,no,Minicircle
,tig00000157,"8,153",42.21,8,32,no,Minicircle
,tig00000816,"8,022",43.23,1,32,no,Minicircle
,tig00000473,"8,022",43.24,0,32,no,Minicircle
,tig00000393,"7,995",41.76,0,32,no,Minicircle
,tig00000449,"7,917",42.98,1,32,no,Minicircle
,tig00000778,"7,871",43.59,1,32,no,Minicircle
,tig00000346,"7,689",44.77,1,32,no,Minicircle
,tig00000791,"7,664",43.15,0,32,no,Minicircle
,tig00000597,"7,634",43.40,0,32,no,Minicircle
,tig00306656,"7,328",45.25,0,32,no,Minicircle
,tig00000557,"7,222",43.04,4,32,no,Minicircle
,tig00000609,"7,082",42.60,0,32,no,Minicircle
,tig00000629,"7,009",41.43,0,32,no,Minicircle
,tig00000824,"6,904",42.22,1,32,no,Minicircle
,tig00000650,"6,904",43.54,0,32,no,Minicircle
,tig00000275,"6,889",42.78,0,32,no,Minicircle
,tig00000786,"6,798",44.31,0,32,no,Minicircle
,tig00003610,"6,733",43.90,0,32,no,Minicircle
,tig00306650,"6,672",42.54,0,32,no,Minicircle
,tig00000781,"6,639",42.64,0,32,no,Minicircle
,tig00000708,"6,604",43.50,0,32,no,Minicircle
,tig00000414,"6,396",43.21,0,32,no,Minicircle
,tig00000587,"6,239",44.59,1,32,no,Minicircle
,tig00306632,"6,202",44.07,0,32,no,Minicircle
,tig00000865,"6,084",44.66,0,32,no,Minicircle
,tig00306658,"5,933",43.54,0,32,no,Minicircle
,tig00000812,"5,845",43.80,0,32,no,Minicircle
,tig00000776,"5,796",43.13,0,32,no,Minicircle
,tig00306635,"5,720",43.76,0,32,no,Minicircle
,tig00000808,"5,639",41.76,0,32,no,Minicircle
,tig00000224,"5,490",45.37,0,32,no,Minicircle
,tig00306653,"5,460",42.97,0,32,no,Minicircle
,tig00000724,"5,385",42.84,0,32,no,Minicircle
,tig00306655,"5,160",44.21,0,32,no,Minicircle
,tig00306630,"5,131",45.70,0,32,no,Minicircle
,tig00306640,"5,095",42.55,0,32,no,Minicircle
,tig00000504,"5,042",42.03,0,32,no,Minicircle
,tig00000857,"4,638",42.58,0,32,no,Minicircle
,tig00306646,"4,547",43.13,0,32,no,Minicircle
,tig00000800,"4,529",42.42,0,32,no,Minicircle
,tig00000337,"4,466",41.58,0,32,no,Minicircle
,tig00306659,"4,395",43.16,0,32,no,Minicircle
,tig00000796,"4,325",44.00,0,32,no,Minicircle
,tig00306634,"4,318",43.26,0,32,no,Minicircle
,tig00306645,"4,301",44.80,0,32,no,Minicircle
,tig00003197,"4,165",42.81,0,32,no,Minicircle
,tig00306649,"4,133",43.53,0,32,no,Minicircle
,tig00306642,"4,103",45.58,0,32,no,Minicircle
,tig00306652,"3,695",40.81,1,32,no,Minicircle
,tig00003617,"3,694",41.64,0,32,no,Minicircle
,tig00306641,"3,455",45.15,0,32,no,Minicircle
,tig00306620,"3,161",46.41,0,32,no,Minicircle
,tig00306638,"2,956",44.18,0,32,no,Minicircle
,tig00003611,"2,912",43.61,0,32,no,Minicircle
,tig00306629,"2,682",45.75,0,32,no,Minicircle
,tig00306644,"2,643",46.42,1,32,no,Minicircle
,tig00002231,"2,633",41.21,0,32,no,Minicircle
,tig00306657,"2,476",41.68,0,32,no,Minicircle
,tig00003612,"1,833",40.86,0,32,no,Minicircle
,tig00306639,"1,250",45.04,0,32,no,Minicircle
,tig00306660,"1,094",39.03,0,32,no,Minicircle
,tig00003594,"27,350",46.50,0,33,no,Subtelomere
,tig00003615,"26,655",49.44,0,33,no,Subtelomere
,tig00003596,"25,674",44.68,0,33,no,Subtelomere
,tig00003606,"24,323",51.41,7,33,no,Subtelomere
,tig00306625,"21,975",47.41,4,33,no,Subtelomere
,tig00000053,"21,493",46.75,14,33,no,Subtelomere
,tig00000698,"21,381",48.07,18,33,no,Subtelomere
,tig00000017,"21,274",47.14,9,33,no,Subtelomere
,tig00306628,"21,177",48.60,2,33,no,Subtelomere
,tig00000034,"21,170",47.49,38,33,no,Subtelomere
,tig00306627,"21,126",49.34,8,33,no,Subtelomere
,tig00003604,"21,020",49.55,9,33,no,Subtelomere
,tig00000810,"20,537",47.87,20,33,no,Subtelomere
,tig00306622,"20,226",46.59,0,33,no,Subtelomere
,tig00306626,"19,796",47.11,1,33,no,Subtelomere
,tig00306647,"19,624",46.75,19,33,no,Subtelomere
,tig00306616,"15,084",47.41,3,33,no,Subtelomere
,tig00306648,"13,239",45.51,0,33,no,Subtelomere
,tig00003616,"12,747",46.37,1,33,no,Subtelomere
,tig00306618,"9,245",46.87,0,33,no,Subtelomere
,tig00000783,"2,803",51.44,4,33,no,Subtelomere
,tig00003603,"1,760",76.08,5,33,no,Subtelomere
,tig00000846,"3,173",46.55,0,34,no,Repeat
